# Supplementary material
Source: PubMed Central journal article supplement (PMC6732984)
Supplement: ao9b00935_si_001.pdf [file ao9b00935_si_001.pdf]

# Supporting Information

High performance UV-assisted NO<sub>2</sub> sensor based on CVD graphene at room  
temperature

Xin Yan,<sup>†</sup> Yanan Wu,<sup>†</sup> Rui Li,<sup>†</sup> Chengqian Shi,<sup>†</sup> Ramiro Moro,<sup>†</sup> Yanqing Ma,<sup>\*,†,‡</sup> and Lei Ma<sup>\*,†</sup>

<sup>†</sup>Tianjin International Center for Nanoparticles and Nanosystems, Tianjin University, Tianjin 300072, China

<sup>‡</sup>State Laboratory of Precision Measuring Technology and Instruments, Tianjin University, Tianjin 300072, China

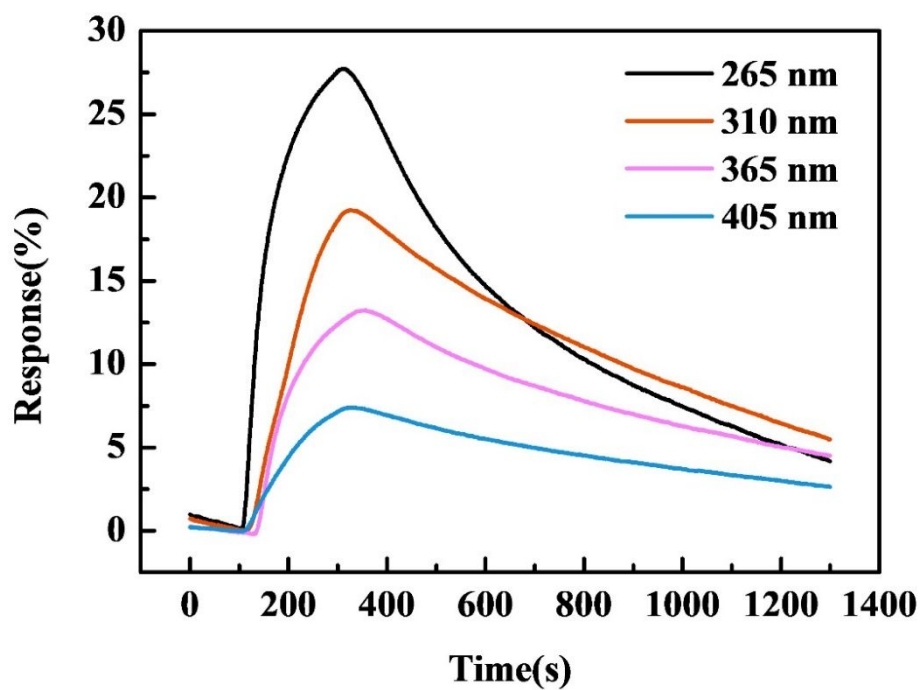

**Figure S1** The response and recovery curves of graphene-based sensor exposed to 100 ppm NO<sub>2</sub> under the different light wavelengths.

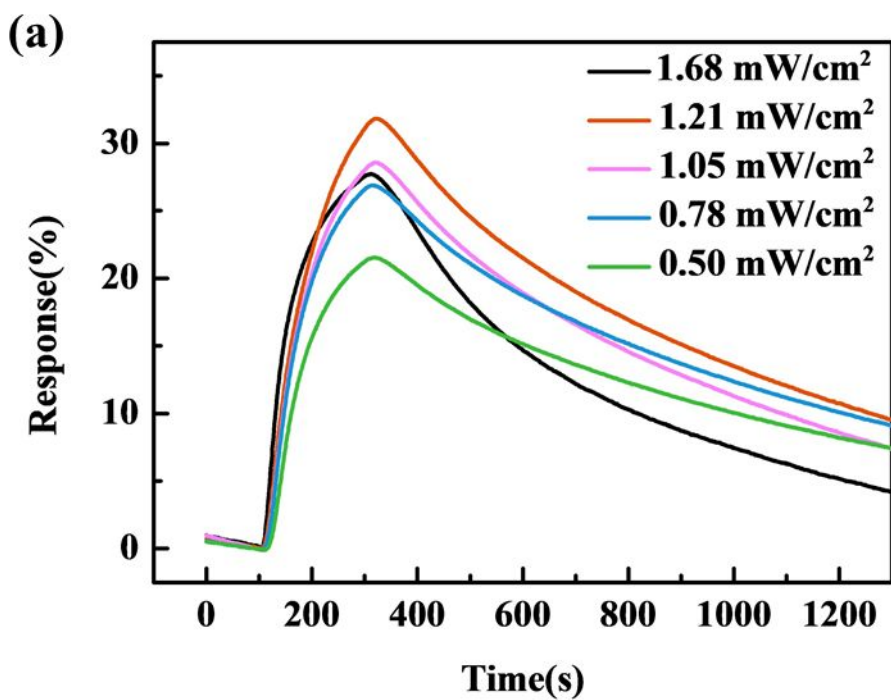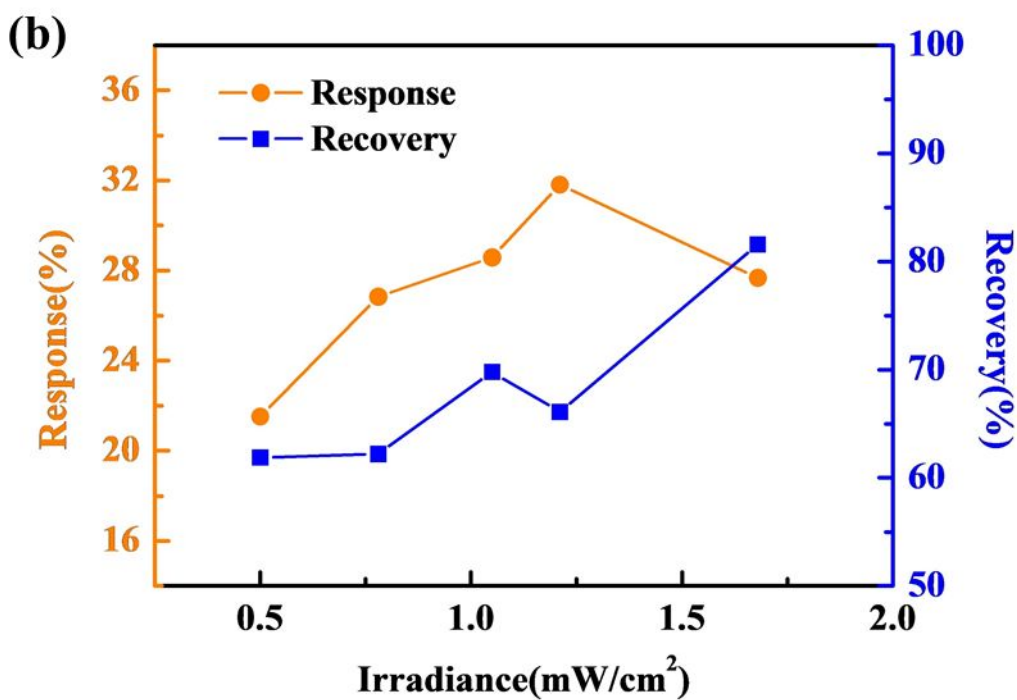

**Figure S2** (a) The response and recovery curves of graphene-based sensor exposed to 100 ppm NO<sub>2</sub> under UV light ( $\lambda = 265$  nm) with different irradiance. (b) The effects of light irradiance in the range of 0.5 – 1.7 mW/cm<sup>2</sup> on the response and recovery of the sensor for NO<sub>2</sub>.
